*Translational medicine*

# Renal sodium avidity in heart failure: from pathophysiology to treatment strategies

Wilfried Mullens<sup>1,2\*</sup>, Frederik Hendrik Verbrugge<sup>1</sup>, Petra Nijst<sup>1,3</sup>, and Wai Hong Wilson Tang<sup>4</sup>

<sup>1</sup>Department of Cardiology, Ziekenhuis Oost-Limburg, Schiepse Bos 6, 3600 Genk, Belgium; <sup>2</sup>Department of Medicine and Life Sciences, Biomedical Research Institute, Hasselt University, Agoralaan Gebouw D, 3590 Diepenbeek, Belgium; <sup>3</sup>Department of Medicine and Life Sciences, Doctoral School for Medicine and Life Sciences, Hasselt University, Agoralaan Gebouw D, 3590 Diepenbeek, Belgium; and <sup>4</sup>Department of Cardiovascular Medicine, Heart and Vascular Institute, Cleveland Clinic, 9500 Euclid Avenue, Cleveland, 44195 Ohio, USA

Received 3 October 2016; revised 1 December 2016; editorial decision 21 December 2016; accepted 16 January 2017; online publish-ahead-of-print 23 February 2017

Increased neurohumoral stimulation resulting in excessive sodium avidity and extracellular volume overload are hallmark features of decompensated heart failure. Especially in case of concomitant renal dysfunction, the kidneys often fail to elicit effective natriuresis. While assessment of renal function is generally performed by measuring serum creatinine—a surrogate for glomerular filtration—, this only represents part of the nephron's function. Alterations in tubular sodium handling are at least equally important in the development of volume overload and congestion. Venous congestion and neurohumoral activation in advanced HF further promote renal sodium and water retention. Interestingly, early on, before clinical signs of heart failure are evident, intrinsic renal derangements already impair natriuresis. This clinical review discusses the importance of heart failure (HF) induced changes in different nephron segments. A better understanding of cardiorenal interactions which ultimately result in sodium avidity in HF might help to treat and prevent congestion in chronic and acute HF.

## Keywords

Heart failure • Kidney • Diuretic • Glomerulus • Natriuresis • Sodium

## Introduction

Approximately 90% of heart failure (HF) hospitalizations are associated with signs and symptoms of volume overload, which is associated with disease progression and worse prognosis.<sup>1,2</sup> While impaired renal sodium ( $\text{Na}^+$ ) excretion secondary to neurohumoral upregulation is the primary abnormality, water movement passively follows  $\text{Na}^+$  to keep osmolality in balance. Additionally, most patients have some degree of renal dysfunction, which impairs the 'reserve' available for the kidneys to respond to the insult posed by cardiac dysfunction.<sup>3</sup> The resulting imbalance leads to sodium accumulation followed by intravascular and interstitial volume retention, and eventually oedema as well as increased cardiac filling pressures.<sup>4</sup>

## Sodium and water homeostasis

A typical Western diet contains approximately 12 g salt (sodium chloride or  $\text{NaCl}$ ) per day, equivalent to  $\sim 4.5$  g or  $\sim 200$  mmol  $\text{Na}^+$ , which is almost completely absorbed in the gastro-intestinal system. From an

evolutionary point of view, humans did not have much access to  $\text{Na}^+$ , so the neurohumoral systems (renin-angiotensin-aldosterone system and sympathetic nerve system) have evolved to retain  $\text{Na}^+$  and preserve effective circulatory volume. After an oral  $\text{Na}^+$  load, its plasma concentration as well as plasma osmolality rises within half an hour and stimulates arginine vasopressin (AVP) release by the hypothalamus, stimulating anti-diuresis.<sup>5</sup> Subsequently, the rise in total body water is sensed by baroreceptors in the large (aortic arch, carotid sinus, atria) and small vasculature (pulmonary vasculature, liver, central nerve system, and renal afferent arteriole) to modulate urinary  $\text{Na}^+$  and water excretion.  $\text{Na}^+$  is freely filtered in the renal glomerulus, but only a tiny fraction is excreted in the urine as tubular  $\text{Na}^+$  reabsorption exceeds 99%. Nevertheless, net renal  $\text{Na}^+$  excretion is highly regulated to mimic dietary intake.<sup>6</sup>

## Importance of renal function in heart failure

Chronic kidney disease (defined as an estimated glomerular filtration rate or GFR less than  $60 \text{ mL/min/1.73 m}^2$ ) is present in up to 60% of

\* Corresponding author. Tel: +3289327087, Fax: +3289327918, Email: wilfried.mullens@zol.be

Published on behalf of the European Society of Cardiology. All rights reserved. © The Author 2017. For permissions, please email: journals.permissions@oup.com.

ambulatory compensated HF patients.<sup>7–9</sup> Importantly, GFR is one of the strongest predictors of mortality and morbidity in HF patients, exceeding other well-known factors such as left ventricular ejection fraction or New York Heart Association functional class.<sup>8</sup> GFR is the net flow rate of plasma ultrafiltrate across the capillary membrane in the glomerulus. However, GFR, is a reflection of only the filtration function of the kidney while other important components of fluid homeostasis, such as renal tubular sodium and water avidity are not taken into account.

Especially in decompensated HF patients renal tubular function is of great interest.<sup>10</sup> Indeed, alterations in tubular function occur as a result of changes in neurohumoral activation and impaired tubular flow which definitely contribute to Na<sup>+</sup> retention. Furthermore, both filtration and tubular functions of the nephron must be maintained to permit the actions of treatments given to alleviate congestion in patients with HF. A large number of markers for renal tubular damage exist: kidney injury molecule–1, neutrophil gelatinase-associated lipocalin, and N-acetyl-beta-glucosaminidase.<sup>11</sup> Importantly, it has been demonstrated that in decompensated HF patients who experience a rise in serum creatinine, the degree of tubular damage is low.<sup>12</sup> Hence, worsening renal function is often not accompanied by tubular injury. However, if increased tubular markers are present, this almost certainly relates to poor outcomes.<sup>13</sup>

## ‘Worsening’ of renal function in heart failure

Patients with pre-existing chronic kidney disease are vulnerable to develop worsening renal function.<sup>14,15</sup> The prevalence of worsening renal function, traditionally defined as an  $\geq 0.3$  mg/dL increase in serum creatinine or  $> 15\%$  reduction in GFR, ranges from 20% to 40% in acute HF.<sup>8,16</sup> Worsening renal function occurs typically within days of hospitalization, suggesting a direct causative effect of haemodynamic derangement associated with HF decompensation and/or iatrogenic treatment adjustments.<sup>17</sup> It is generally accepted that systemic haemodynamic derangements (elevated venous pressure, elevated intra-abdominal pressure, arterial blood pressure drops) rather than impaired cardiac output are the main drivers for GFR decline during acute decompensated HF.<sup>3,18–22</sup> Although, less understood, neurohumoral and inflammatory derangements also play a role in the complex pathophysiology of worsening renal function. Whereas baseline GFR is invariably linked to worse outcomes, recent studies about the prognostic value of worsening renal function in the setting of acute decompensated HF are mixed.<sup>18,21,22</sup> Indeed, when accompanied by successful treatment of volume overload, short-time declines in GFR even track with better prognosis.<sup>23,2</sup> Therefore, worsening renal function might merely reflect the result of effective decongestion—sometimes indicated by haemoconcentration—as well as intensified therapy with angiotensin-converting enzyme-inhibitors (ACE-I) or angiotensin receptor blockers (ARB). In contrast, worsening renal function might also be the result of persistent volume overload and/or neurohumoral derangements.<sup>2,14</sup> The latter being a reflection of the inability of the kidneys to preserve Na<sup>+</sup> homeostasis, which has been consistently associated with higher mortality and

more frequent readmissions in HF. To conclude, GFR has proven to be a very important prognostic marker, but therapy should not be tailored to GFR to improve outcome.

## Understanding the kidney in HF; different nephron segments

The kidneys’ function is to clear toxins and waste products as well as to maintain the body’s fluid- and electrolyte homeostasis and to preserve tissue perfusion. Hence, the kidneys must filter a sufficient—rather fixed—amount of blood per time from the renal glomerular capillaries into Bowman’s capsule (filtration function) and precisely regulate tubular water and solute reabsorption (tubular function). These tasks are performed by different, highly specialized segments of the nephron.

### Glomerulus

GFR depends on hydrostatic and colloid osmotic pressure differences between glomerular capillaries and Bowman’s space (Starling forces), as well as the number of functional glomeruli.<sup>10</sup> Alterations in glomerular Starling forces are mainly the result of changes in hydrostatic pressure since the colloid osmotic pressure in the afferent arteriole is stable. In normal circumstances, renal perfusion or renal blood flow (RBF) is around 20% of cardiac output, and determined by the difference between renal arterial and venous pressure, the intra-abdominal pressure and renal vasculature resistance. An important feature of the renal micro-circulation is *autoregulation*, which tries to keep GFR within narrow limits by adjusting the resistance of the afferent arterioles in response to renal arterial pressure and flow fluctuations through the nephron (Figure 1). First, a decrease in mean arterial blood pressure will lead to redistribution of blood volume to preserve kidney perfusion.<sup>11</sup> A second mechanism called ‘tubuloglomerular feedback’ protects the glomerulus from hyperfiltration by keeping chloride (Cl<sup>−</sup>) load in Henle’s loop at a constant level.<sup>12</sup> An increase in GFR will increase the delivery of Cl<sup>−</sup> to macula densa cells. This stimulates paracrine release of adenosine which in turn induces vasoconstriction of the afferent arteriole and restores GFR.<sup>13,14</sup> Additionally, increased filtration in the glomerulus is met by increased reabsorption in the proximal renal tubules through a second feedback mechanism: ‘glomerulotubular balance’.<sup>15</sup> Finally, because of the high filtration coefficient of the glomerular filtration barrier along the length of the glomerular capillaries, the GFR is relatively well maintained when the RBF drops, until the filtration equilibrium is reached. This will result in an increase in the filtration fraction, even without neurohumoral interference.<sup>24</sup> Indeed, when RBF is increased vs. reduced in the face of a preserved GFR, the ratio of GFR/RBF or filtration fraction, will be altered. Hence, two patients with similar GFR can exhibit a different filtration fraction and renal tubular Na<sup>+</sup> handling (Figure 2).

Furthermore, numerous other factors contribute to an impaired GFR in HF. First, there is a lower number of functionally active glomeruli. Second, neurohumoral activation in HF contributes to both low RBF and high filtration fraction, through increased systemic and local levels of angiotensin II. Angiotensin II stimulates

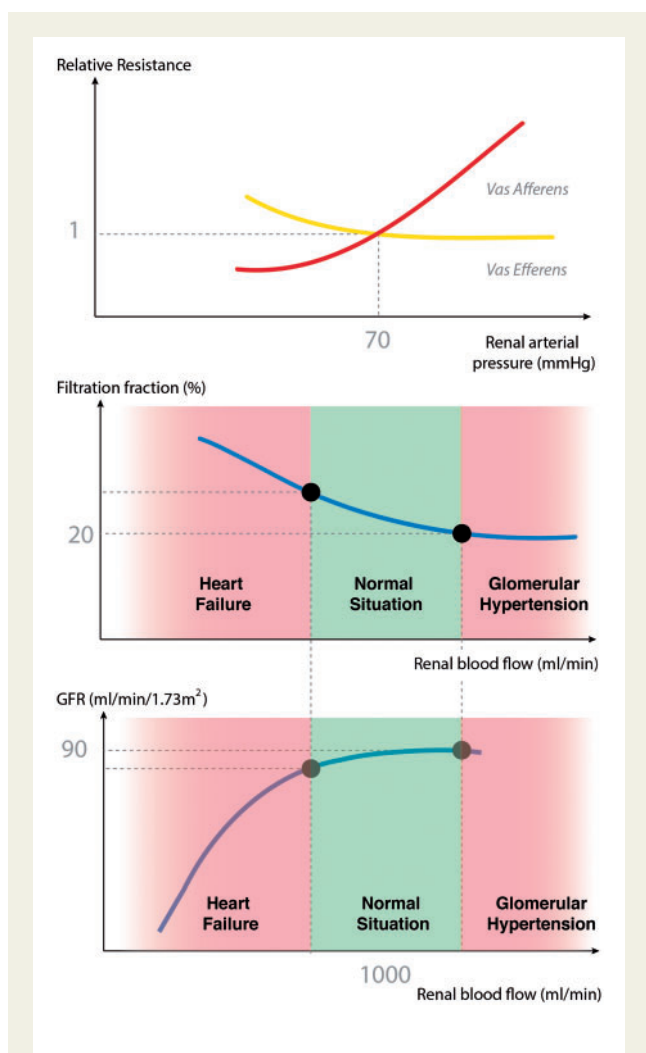

**Figure 1** Relationship between filtration fraction and the glomerular filtration rate (GFR). The kidney tries to preserve the GFR with changes in filtration fraction over a wide range of arterial pressures by altering the resistance of the afferent and efferent arteriole.

vasoconstriction, predominantly in the efferent arteriole.<sup>19,25</sup> Third, backward failure due to increased central venous pressure is associated with decreased RBF and deterioration of GFR.<sup>20–23</sup> Several reports have confirmed that increased renal venous pressure decreased RBF accompanied by an increase in filtration fraction up to 60%.<sup>2,24,26,27</sup> Fourth, increased intra-abdominal pressure, compromised capacitance function of the splanchnic vasculature, impaired abdominal lymph flow can all be involved in subsequent deterioration of GFR. Additionally, dysfunction of congested abdominal organs, impaired intestinal barrier function, and endocrine effects of gut derived hormones or toxins further drive GFR decline.<sup>25–27</sup> Finally, aggressive decongestive therapy might result in intravascular under-filling, resulting in a drop in GFR.<sup>17,18</sup>

## Proximal tubule

The major site of  $\text{Na}^+$  reabsorption in the nephron is the proximal tubule. The reabsorbed fraction of filtered  $\text{Na}^+$  (65%) is kept stable

(65%) in the proximal tubule due to glomerulotubular feedback.<sup>28</sup> Several transporters on the luminal tubular membrane mediate  $\text{Na}^+$  uptake. Subsequently,  $\text{Na}^+$  is pumped out into the renal interstitium by  $\text{Na}^+/\text{K}^+$ -ATPases at the basolateral membrane. Peritubular capillaries reabsorb interstitial  $\text{Na}^+$  while water passively follows in an iso-osmotic process.<sup>29</sup> Importantly, these Starling forces across the peritubular capillaries are not influenced by neurohumoral activation but determined by local haemodynamics of the microcirculation. Additionally, increased flow in the proximal tubule stimulates  $\text{Na}^+$  reabsorption.

In HF, haemodynamic and neurohumoral changes facilitate  $\text{Na}^+$  and water reabsorption in the proximal tubules (Figure 3). First, increased filtration fraction, as a result of reduced RBF, raises peritubular capillary oncotic pressure promoting  $\text{Na}^+$  reabsorption. Second, renal venous hypertension substantially alters the hydrostatic pressure in both the renal interstitium and peritubular capillaries but also in the tubular lumen, since the kidney is an encapsulated organ.<sup>30</sup> Additionally, HF is characterized by an increased renal lymph flow, washing out interstitial proteins and decreasing colloid osmotic pressure in the renal interstitium, further promoting sodium reabsorption.<sup>31,32</sup> Peritubular capillaries are virtually impermeable to plasma proteins, which explains why intra-capillary colloidal osmotic pressure remains high.<sup>29</sup> To conclude, in HF, the amount of  $\text{Na}^+$  delivered to the distal parts of the nephron will be substantially reduced, even more in case of a reduced GFR, which has important therapeutic implications as these are the sites of action for loop and thiazide type diuretics, as well as endogenous natriuretic peptides.

## The loop of Henle

Only about a third of the volume filtered by the glomerulus reaches the loop of Henle. The loop of Henle plays a key role in both dilution and concentration of urine. The main functions of the loop are to remove more  $\text{NaCl}$  than water from the tubular fluid and to deposit this  $\text{NaCl}$  in the interstitium of the renal medulla, which provides the hypertonic gradient needed in the distal parts of the nephron as a force to concentrate the urine (Figure 4).

Overall, the loop of Henle reabsorbs more salt than water, so the fluid entering the distal tubules will be hypo-osmotic. Whether the final urine is diluted or concentrated depends on how much water is reabsorbed by the distal nephron. This requires water permeability of these segments achieved by AVP and expression of aquaporin-2 channels (See supplementary material for a detailed description of normal physiology of the loop of Henle).<sup>33,34</sup>

In heart failure, natriuresis and maximal free water excretion are compromised (Figure 5). First, reabsorption of water and solutes is increased in the proximal tubules in heart failure, so less tubular fluid will be provided to the loop of Henle. Second, neurohumoral activation further increases active  $\text{Na}^+$  reabsorption in the ascending parts of the loop of Henle.<sup>35</sup> Third, poor flow through the vasa recta as a result of vasoconstriction and poor renal blood flow prevents wash-out of solutes from the renal medulla impairing the capacity of the kidneys to dilute the urine and excrete free water.<sup>36,37</sup>

Loop diuretics increase the amount of tubular fluid presented to the distal nephron by their powerful inhibitory effect on  $\text{Na}^+/\text{K}^+/\text{2Cl}^-$ -symporters in the thick ascending limb of Henle's loop. Consequently, they interfere with the generation of hypertonicity in

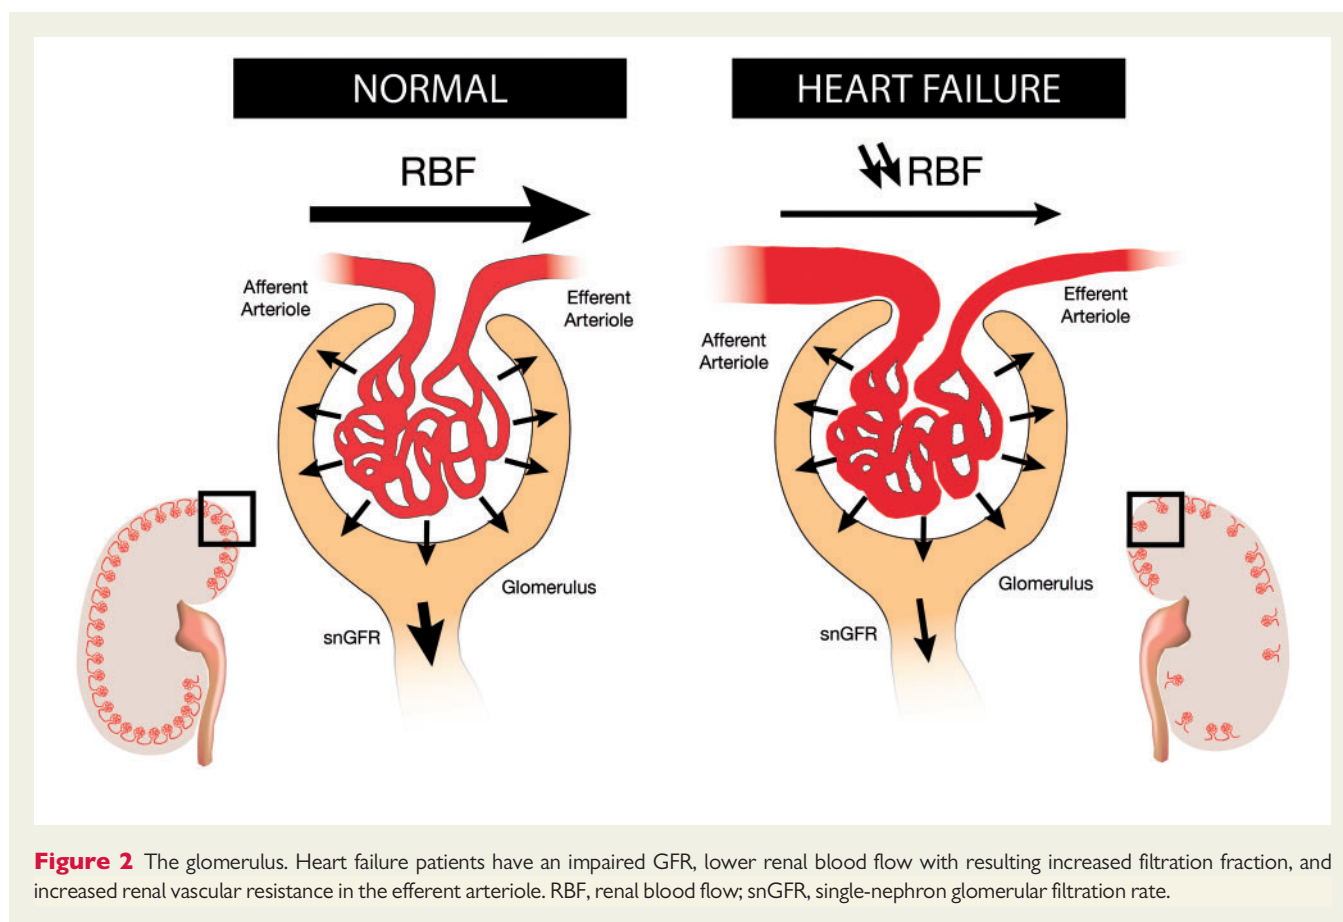

the renal medullary interstitium, decreasing the osmotic gradient that is promoting water reabsorption in the collecting ducts. Because of the interference of loop diuretics with the renal capacity to concentrate urine, less free water is reabsorbed, resulting in production of hypotonic urine.<sup>38</sup>

## Macula densa

The final part of the thick ascending loop of Henle contains packed cells in close to the afferent arteriole which secrete different hormones in response to changes in intra-tubular  $\text{Cl}^-$  concentrations (i.e. tubuloglomerular feedback) (Figure 5). After luminal transport by the  $\text{Na}^+/\text{K}^+/\text{2Cl}^-$ -symporter, a decrease in intracellular  $\text{Cl}^-$  concentrations initiates intracellular cyclo-oxygenase-2 and nitric oxide synthetase I activity, leading to paracrine prostaglandin  $\text{E}_2$  and nitric oxide secretion. These paracrine signals decrease afferent arteriolar resistance, and thus increase intraglomerular hydrostatic pressure, RBF and GFR.<sup>39</sup> Furthermore, decreased  $\text{Cl}^-$  load will trigger renin release by afferent arteriolar cells, leading to further activation of the renin-angiotensin-aldosterone axis. High angiotensin II levels facilitate catecholamine release by the sympathetic nerve system, increasing vasoconstriction of predominantly the efferent arterioles and release of AVP in the posterior pituitary gland. Angiotensin II, increased sympathetic nerve activity as well as AVP promote the expression of active  $\text{Na}^+$  transporters along the entire length of the nephron, thereby further promoting fractional  $\text{Na}^+$  reabsorption.

As HF is characterized by an increased fractional  $\text{Na}^+$  and  $\text{Cl}^-$  reabsorption in the proximal tubules,  $\text{Cl}^-$  delivery to the macula densa will further be reduced, which triggers through the aforementioned mechanism  $\text{Na}^+$  reabsorption and neurohumoral activation, probably contributing to disease progression.<sup>24</sup> Importantly, loop diuretics 'deceive' macula densa cells by inhibiting  $\text{Cl}^-$  uptake which will directly trigger further renin release.

## Distal convoluted tubule and collecting duct

The distal tubules reabsorb only a minor fraction ( $\leq 10\%$ ) of the total amount of  $\text{Na}^+$  filtered by the glomerulus. However, they are very important as the distal fractional reabsorption rate varies significantly depending on the tubular flow rate, aldosterone and AVP levels.<sup>40–42</sup> Therefore, the distal convoluted tubule and collecting duct are responsible for fine-tuning the urinary  $\text{Na}^+$  concentration and osmolality. However, maintaining a neutral  $\text{Na}^+$  balance depends highly on adequate  $\text{Na}^+$  delivery to the distal nephron.

Urinary dilution (i.e. free water excretion) is achieved through continued solute reabsorption, primarily through the thiazide-sensitive  $\text{Na}^+/\text{Cl}^-$  symporter and aldosterone-sensitive epithelial  $\text{Na}^+$  channels.<sup>43,44</sup> The relatively low permeability of this segment to water is only overcome by insertion of aquaporin channels expressed when AVP is high (Figure 6).

In HF, tubular flow in the distal part of the nephron may be low despite significant volume overload secondary to increased fractional



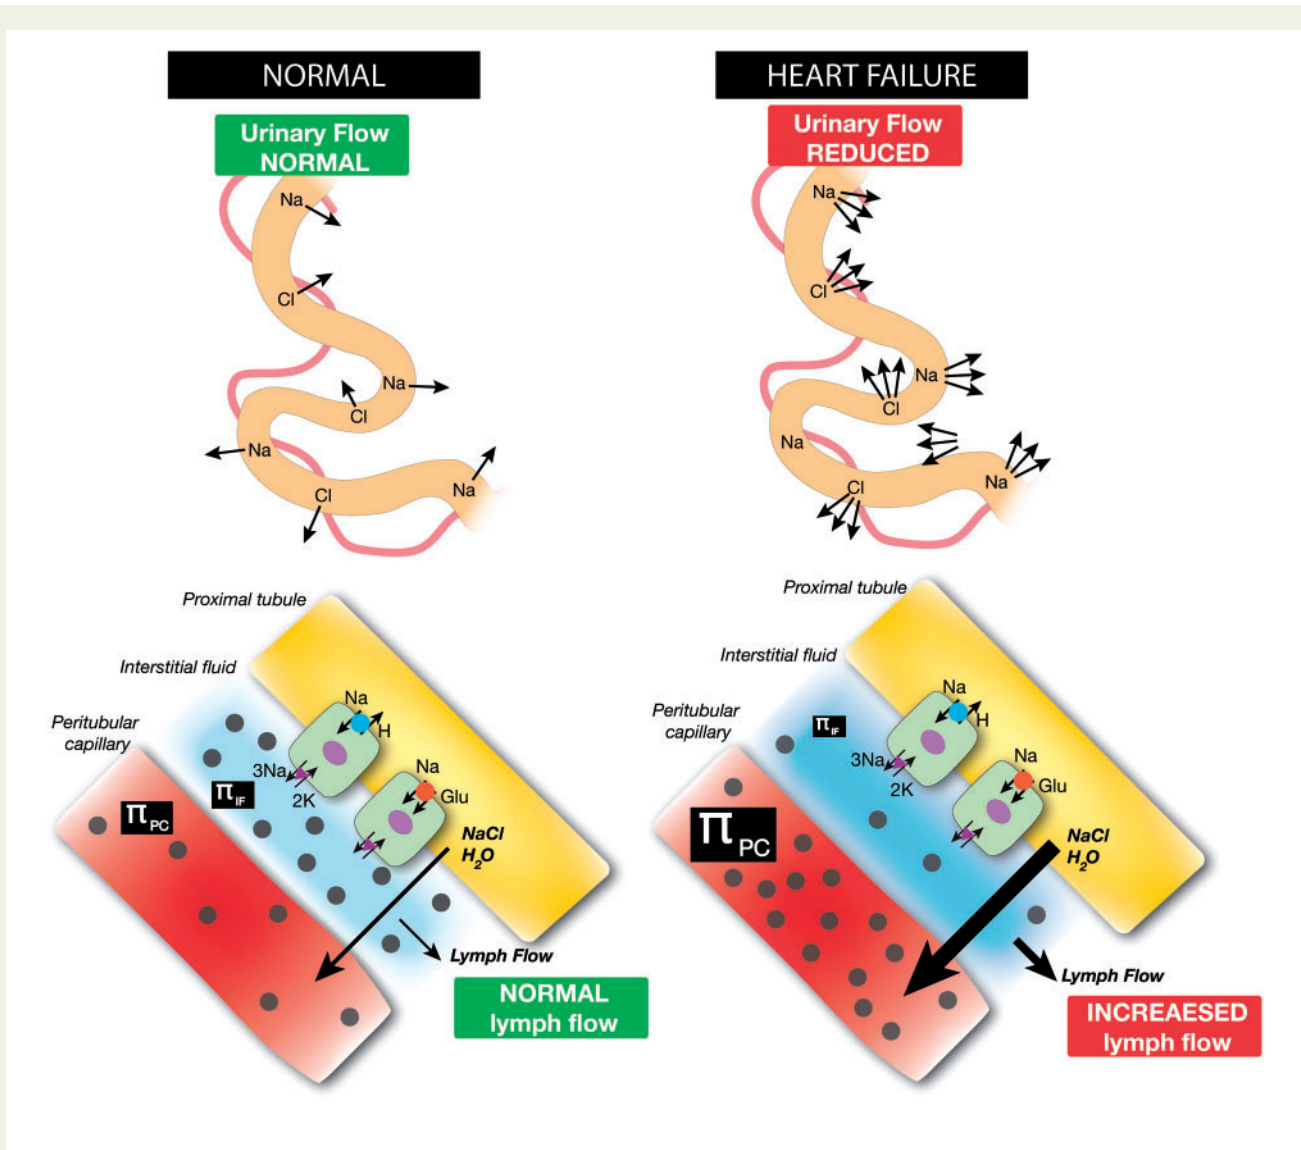

**Figure 3** The proximal tubules. Haemodynamic and neurohumoral-induced changes in hydrostatic and colloid osmotic pressure in the renal interstitium and peritubular capillaries facilitate Na<sup>+</sup> and water reabsorption in the proximal tubules. Additionally, an increased renal lymph flow washes out interstitial proteins and decreases colloid osmotic pressure in the renal interstitium further promoting passive Na<sup>+</sup> reabsorption. The absolute amount of Na<sup>+</sup> delivered to the distal parts of the nephron will be substantially reduced.

reabsorption in the proximal parts of the tubules and often concomitantly decreased GFR. Moreover, aldosterone levels are high, which further stimulates reabsorption of remaining tubular Na<sup>+</sup>. Also, the presence of a high osmotic interstitial oncotic pressure (resulting from high Na<sup>+</sup> reabsorption more proximal, and low flow through vasa recta along the Loop of Henle) as well as high AVP levels further promote water retention.<sup>45</sup>

Finally, in HF, 'aldosterone break-through' and 'the braking phenomenon' often occur. In normal circumstances, large amounts of exogenous aldosterone do not cause oedema, since urinary Na<sup>+</sup> excretion exceeds aldosterone induced distal Na<sup>+</sup> reabsorption.<sup>46</sup> Aldosterone break-through occurs as the distal nephron cannot fully reabsorb the increased Na<sup>+</sup> load resulting from increased filtration due to volume expansion and upregulation of natriuretic peptides. However, in HF fractional Na<sup>+</sup> reabsorption in the proximal tubules is greatly

enhanced, so distal Na<sup>+</sup> delivery remains low. As a result, aldosterone break-through is observed despite treatment with an adequately dosed ACE-I.<sup>47</sup> Additionally, repeated dosing of loop diuretics leads to reduction in diuretic efficacy (= amount of Na<sup>+</sup> excreted per dose of loop diuretic), i.e. the so-called 'braking phenomenon' due to intrinsic renal adaptations with hypertrophy of distal tubular cells, causing increased distal Na<sup>+</sup> uptake as well as further aldosterone secretion.<sup>48–51</sup>

## How to treat the increased renal sodium avidity in heart failure?

Treatment of renal sodium avidity is different in acute HF vs. chronic HF. Whereas in acute HF it is important to efficiently decongest the patient,



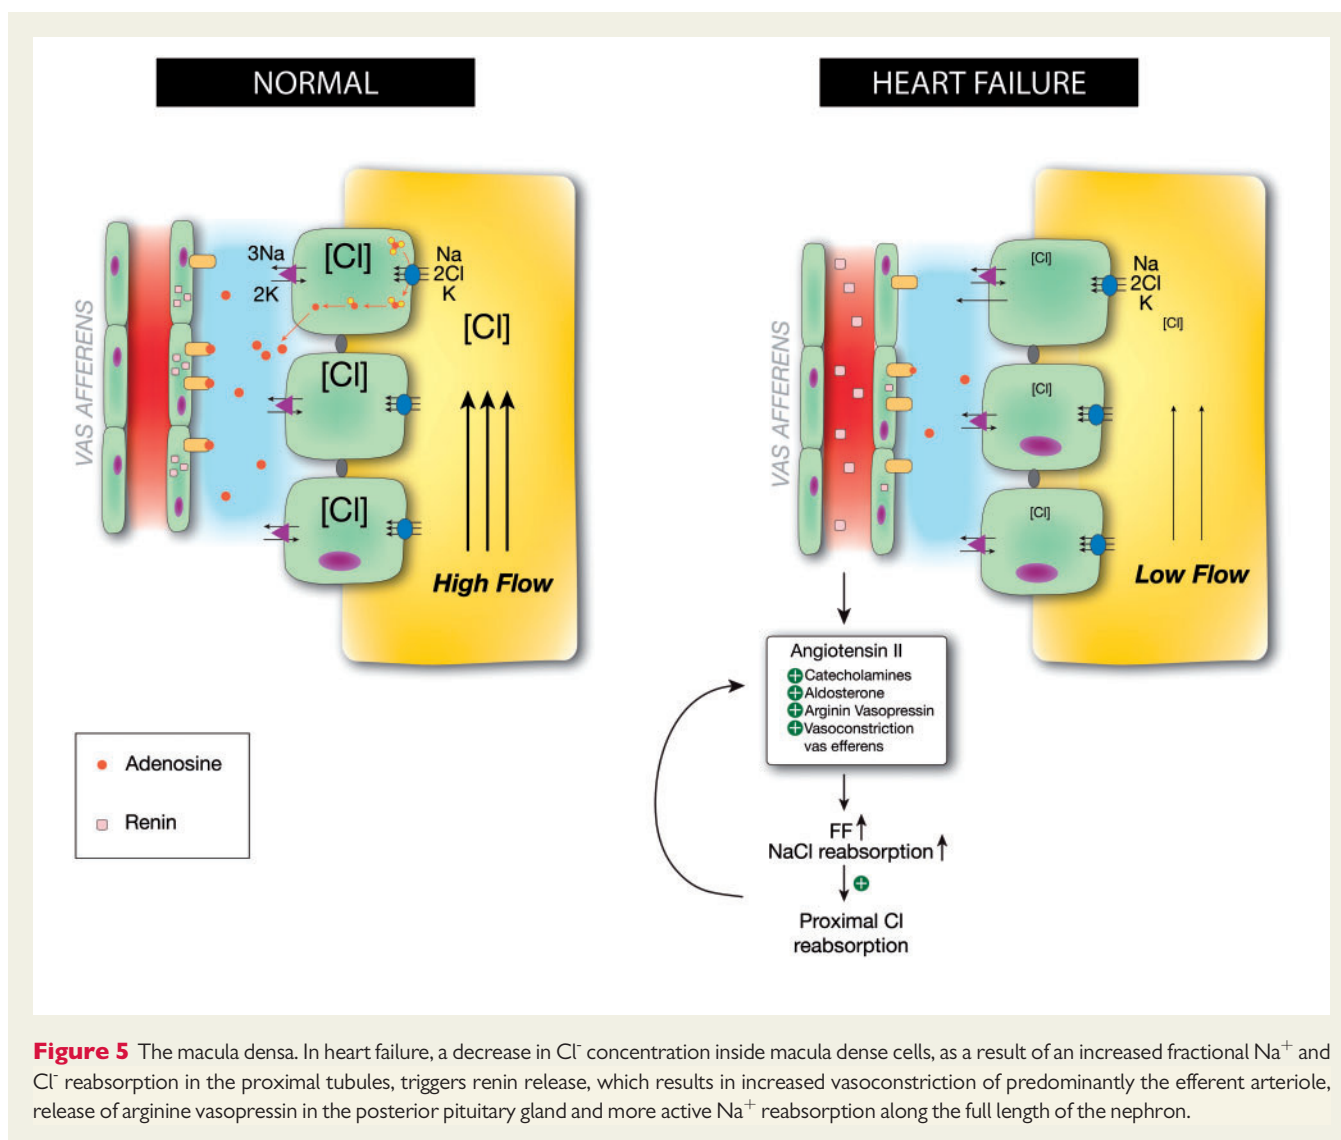

reflects both glomerular and tubular function—might be a successful strategy to achieve effective decongestion.<sup>2</sup> Therefore, loop diuretic efficiency, defined as Na<sup>+</sup> output over loop diuretic dose, has emerged as one of the best markers to assess the cardio-renal interaction since this better reflects the renal reaction to volume status on the filtration and tubular level. Importantly, its prognostic strength is virtually unaffected even when adjusted for GFR.<sup>48–50,56,58–60</sup> However, logistic difficulties with collection of urine samples, and failure to identify the specific etiology and best treatment strategy, in case of a poor response, result in a lack of wide-spread clinical use at the moment. However, a urinary spot analysis after administration of a loop diuretic has been demonstrated to accurately reflect natriuretic response and might make an individualized approach in HF patients feasible.<sup>61</sup>

There are several reasons why loop diuretics might lose efficacy. First, loop diuretic efficacy depends on adequate delivery of the pharmacological agent itself and its substrate (i.e. NaCl) to the loop diuretic site of action at the luminal side of the thick ascending limb of Henle's loop. Importantly, loop diuretics must be actively secreted

into the tubular lumen as they bind to the luminal surface of the transporter. This requires an adequate dosing strategy, with higher doses needed, especially if renal function is compromised.<sup>62</sup> Due to intra-abdominal oedema in acute decompensated HF, orally administered diuretics are less reabsorbed. Because of improved bioavailability of bumetanide and torsemide, they are preferred over furosemide in such cases.<sup>63–65</sup> However, IV diuretics are more effective. Based on the results of the Diuretic Optimization Strategies Evaluation (DOSE)-trial, no specific intravenous strategy (high vs. low, continuous vs. bolus) appeared to be superior over another.<sup>66</sup> In addition, concerns remain of potential adverse effects of high-dose loop diuretics on intravascular volume depletion with coinciding hypotension, neurohumoral activation (increased release of renin at macula densa level), potassium and magnesium wasting, and hyperuricemia.<sup>67–69</sup>

If adequately dosed IV loop diuretics are insufficient, combination therapy should be tried. Thiazide-type diuretics can overcome loop diuretic responsiveness caused by distal tubular hypertrophy.<sup>70</sup> Thus combining loop and thiazide diuretics

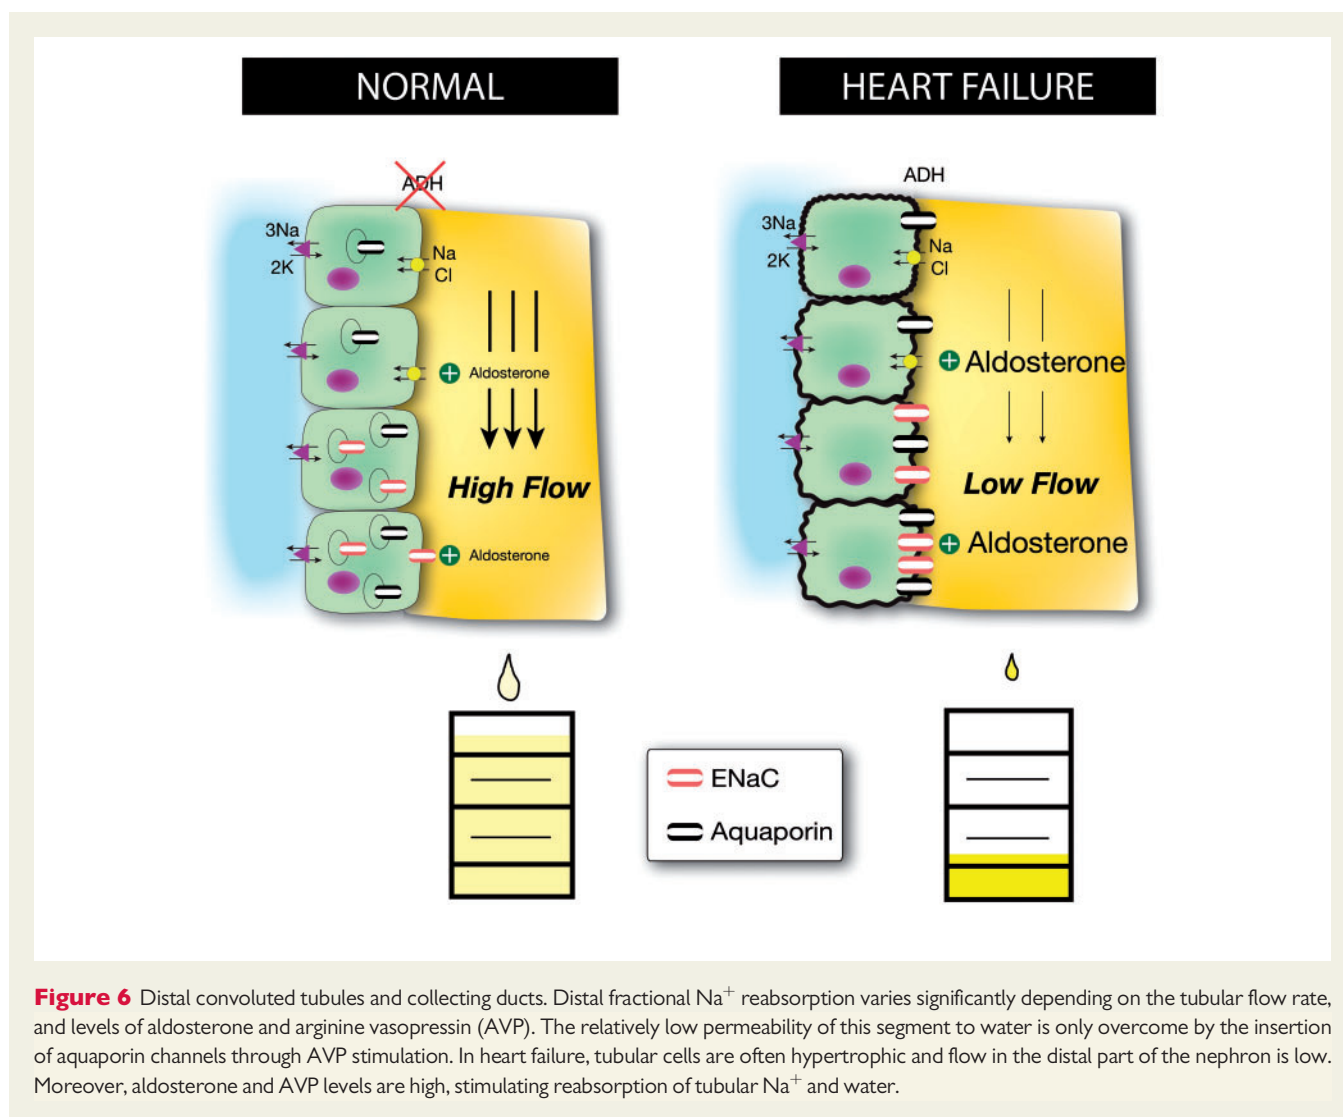

**Figure 6** Distal convoluted tubules and collecting ducts. Distal fractional  $\text{Na}^+$  reabsorption varies significantly depending on the tubular flow rate, and levels of aldosterone and arginine vasopressin (AVP). The relatively low permeability of this segment to water is only overcome by the insertion of aquaporin channels through AVP stimulation. In heart failure, tubular cells are often hypertrophic and flow in the distal part of the nephron is low. Moreover, aldosterone and AVP levels are high, stimulating reabsorption of tubular  $\text{Na}^+$  and water.

seems appropriate in patients on chronic maintenance therapy with loop diuretics to increase the diuretic response. However, thiazide-type diuretics limit free water excretion and should be withheld in cases of hyponatremia.

Also, mineralocorticoid receptor antagonists have been an established treatment for symptomatic HF and counteract aldosterone break-through.<sup>71,72</sup> Additionally, to minimize potassium-wasting by loop diuretics and improve diuretic efficacy, there is a strong rationale to continue oral maintenance dosages of mineralocorticoid receptor antagonists and even increase the dose when GFR is stable and serum potassium levels are  $<5.5$  mmol/L. However, the recently presented Aldosterone Targeted NeuroHormonal CombinEd with Natriuresis TherApy–Heart Failure (ATHENA-HF) trial did not demonstrate a more profound reduction in NT-proBNP levels when high dose (100 mg daily) spironolactone was used during the first days of acute HF compared to continuation of low dose (25 mg daily) or placebo. Nevertheless, the investigators concluded that the role of high dose mineralocorticoid receptor antagonist specifically targeted to patients resistant to loop diuretics needs to be further studied in a large randomized trial.

Furthermore, targeting  $\text{Na}^+$  reabsorption in the proximal tubules has several potential benefits in decompensated HF as it is the place where most  $\text{Na}^+$  is reabsorbed. Indeed, blocking  $\text{NaCl}$  reabsorption proximally will provide more flow to more distal parts of the nephron including macula densa cells. This should be accompanied by decreased renin release and increased loop-diuretic efficacy. Such an approach is therefore especially warranted in cases of low RBF and low fractional  $\text{Na}^+$  excretion. Acetazolamide, an old and largely forgotten diuretic which is hardly used in HF at the moment, is a carbonic anhydrase inhibitor which blocks sodium bicarbonate reabsorption in the proximal tubules.<sup>24</sup> One observational study in patients with acute HF and marked volume overload found that the addition of acetazolamide improved loop diuretic efficacy with  $\sim 100$  mmol  $\text{Na}^+$  excreted per 40 mg of furosemide-equivalent dose.<sup>48</sup> Furthermore, acetazolamide also improves thiazide-type diuretic efficacy, as it potentially downregulates pendrin expression in the distal nephron.<sup>73</sup> Pendrin, also known as the sodium-independent  $\text{Cl}^-/\text{iodide}$  transporter, can compensate for  $\text{Na}^+$  and  $\text{Cl}^-$  loss in the distal convoluted tubules and might be an unrecognized source of



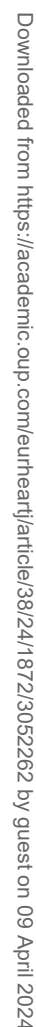

**Figure 7** Different nephron segments with nephron-based therapy. (A) Vasodilation increases renal blood flow thereby lowering filtration fraction and reducing proximal sodium reabsorption. (B) Proximal-working diuretic agents (acetazolamide, sodium-glucose transporter-2 inhibitors) block proximal sodium reabsorption, promoting tubular flow and solvent drag resulting in more effective loop diuretic therapy and reduced renin release. (C) Loop diuretics block NaCl reabsorption in the loop of Henle and macula densa cells thereby reducing the medullar interstitial hypertonic gradient promoting both natriuresis and water excretion. (D) Thiazide-type diuretics block  $\text{Na}^+/\text{Cl}^-$  symporters in the distal convoluted tubules. (E) Mineralocorticoid receptor antagonists compete with aldosterone for binding to intracellular receptors causing: (1) decreased synthesis of apical Na channels (2) decreased Na/K ATPase pumps in the basolateral membrane. (F) Vaptans block aquaporin channels. (1) Glomerulus, (2) Proximal tubules, (3) Loop of Henle, (4) Macula densa, (5) Distal convoluted tubules and collecting ducts.

diuretic resistance.<sup>74,75</sup> Thus, although the diuretic and natriuretic capacity of acetazolamide is poor on its own, it might well be a very efficient booster of diuretic efficacy in combinational diuretic therapy with loop diuretics.<sup>73,76</sup> This concept is further supported by one small randomized trial including 24 patients with volume overload refractory to loop diuretic therapy.<sup>77</sup> All these patients demonstrated a greatly reduced fractional sodium excretion, which was easily overcome by the addition of acetazolamide. Whether improved diuretic efficacy with acetazolamide in heart failure and cardio-renal syndrome translates into better natriuresis and clinical outcomes is currently being tested in one randomized clinical trial (Clinical Trial NCT01973335).

## Vasodilator therapy

Vasodilation in acute HF reduces cardiac afterload, increases renal blood flow and improves intrarenal haemodynamics. It also targets the principal haemodynamic problem in HF patients with high filling pressures but without clinical signs of volume overload. Also, in volume overloaded patients with acute HF, combination with vasodilator and diuretic therapy can facilitate decongestion. Vasodilator use is supported by a retrospective analysis of 4953 patients, which used propensity-matching to demonstrate improved survival over patients in whom cardiac output was increased through inotropes.<sup>78</sup> Additionally, another observational study has suggested that a lower dose of diuretics is needed to achieve decongestion when vasodilator therapy is added.<sup>79</sup> Observational data have demonstrated that nitroprusside titrated to blood pressure, with subsequent conversion to combinational treatment with oral hydralazine and nitrates is feasible, and potentially associated with better outcome in advanced HF with low cardiac output.<sup>80,81</sup> This approach is particularly attractive in patients in whom renin-angiotensin system blockers are contraindicated due to chronic kidney disease with severely compromised GFR.

However, low-dose dopamine or nesiritide, both sharing renal vasodilator properties, in participants with acute heart failure and renal dysfunction, did not enhance decongestion or improve GFR when added to standard diuretic therapy.<sup>82</sup> Furthermore, there was no significant difference between placebo and these therapeutics regarding re-hospitalization and death. Very recently, the Efficacy and safety of Ularitide for the treatment of Acute decompensated Heart Failure (TRUE-AHF trial) tested the hypothesis that Ularitide improves symptom relief, decongestion and kidney function in patients with acute HF. Ularitide, a chemically synthesized form of urodilatin, a human natriuretic peptide, is a novel drug also acting on the natriuretic pathway produced by differential processing of pro-atrial natriuretic peptide.<sup>83</sup> Phase I and phase II studies were promising.<sup>84–87</sup> However, the TRUE-AHF trial only demonstrated an advantage of Ularitide over placebo regarding short-term decongestion parameters and in-hospital heart failure events. Early vasodilator therapy with Ularitide could not reduce myocardial injury or long-term risk of cardiovascular death in this study. In contrast, in the Relaxin in Acute Heart Failure (RELAX-AHF) trial, serelaxin has emerged as the first therapy which potentially reduced all-cause mortality in patients with acute HF.<sup>88</sup> Serelaxin is recombinant human relaxin-2, which is normally produced by women during pregnancy. It potentially increases RBF and reduces filtration fraction but does not significantly affect the GFR.<sup>89</sup> Interestingly, the increase in RBF (up to 50%) probably relates to a reduction in venous congestion and vasodilation of

the afferent and efferent arteriole unloading the glomerulus.<sup>90</sup> It remains to be proven in the ongoing RELAX-AHF-2 trial (Efficacy, Safety and Tolerability of Serelaxin When Added to Standard Therapy in AHF) that serelaxin offers more benefits than nesiritide/dopamine/ularitide regarding its predefined end-point.

## Ultrafiltration

Studies on mechanical removal of fluid have yielded conflicting results.<sup>91–93</sup> Ultrafiltration removes isotonic fluid directly from the plasma compartment and is more efficient than diuretic therapy in getting rid of sodium. However, complications due to venous access and uncertainty about timing, patient selection, duration, and rate of fluid removal hamper its use.

## Chronic HF

In chronic HF, preserving a euvolemic state through neurohumoral blockers and adherence to low sodium diet is critical to prevent HF disease progression. The need for loop diuretic use should be evaluated continuously, and the dose should be reduced if possible as they might prevent adequate up-titration of neurohumoral blockers. Intriguingly, new drugs in the treatment of chronic HF, which also decrease sodium avidity, have demonstrated improved HF hospitalizations and survival.

## RAAS-blockers

Renin-angiotensin system blockers mediate *efferent* arteriolar vasodilation and therefore an increase RBF while decreasing filtration fraction. Besides their impact on remodelling and prognosis in HF, RAAS-blockers lead to increased diuretic and natriuretic capacity in chronic (and acute HF), even in the face of a potential drop in GFR when therapy is initiated.<sup>94</sup>

## SGLT-2 inhibitors

Sodium-glucose transporter-2 (SGLT-2) inhibitors—which recently demonstrated striking effects on cardiovascular endpoints in type II diabetes patients—induce an osmotic diuresis as well as direct inhibition of proximal tubular Na<sup>+</sup> absorption.<sup>95</sup> Therefore, like Acetazolamide, the SGLT-2 inhibitors are interesting options, yet to be studied in chronic HF, as they should enhance distal tubular flow in the nephron counteracting Na<sup>+</sup> retention, facilitating decongestive treatment, and boosting loop diuretic responsiveness.

## Sacubitril/valsartan

Recent data demonstrated that sacubitril/valsartan—a combined angiotensin receptor blocker and neprilysin inhibitor—significantly reduces mortality among chronic HF patients with reduced ejection fraction compared to an ACE-I.<sup>96</sup> Based on these results, Sacubitril/Valsartan received a class IB recommendation in the 2016 European guidelines on Heart Failure to replace ACE-inhibition in ambulatory symptomatic HFREF patients. Data suggest that neprilysin inhibition provides beneficial outcomes by preventing the degradation of natriuretic peptides, and thereby promoting natriuresis, vasodilation and counteracting the negative cardiorenal effects of the upregulated RAAS.<sup>97</sup>

## Conclusions

Heart failure is associated with increased  $\text{Na}^+$  avidity and extracellular volume overload. Reduced number of nephrons, intra-renal haemodynamic alterations, neurohumoral activation, and tubular hypertrophy all contribute to diminished natriuretic efficiency of diuretics. A tailored individualized use of combination diuretic therapy together with newly emerging treatment options, rather than blind up-titration of loop diuretics, could be beneficial to achieve thorough decongestion.

## Supplementary material

Supplementary material is available at *European Heart Journal* online.

## Acknowledgement

Lars Grieten PhD for the figures.

**Conflict of interest:** None declared.

## References

- Costanzo MR, Jessup M. Treatment of congestion in heart failure with diuretics and extracorporeal therapies: effects on symptoms, renal function, and prognosis. *Heart Fail Rev* 2012;**17**:313–324.
- Metra M, Davison B, Bettari L, Sun H, Edwards C, Lazzarini V, Piovaneli B, Carubelli V, Bugatti S, Lombardi C, Cotter G, Dei Cas L. Is worsening renal function an ominous prognostic sign in patients with acute heart failure? The role of congestion and its interaction with renal function. *Circ Heart Fail* 2012;**5**:54–62.
- Mullens W, Abrahams Z, Francis GS, Sokos G, Taylor DO, Starling RC, et al. Importance of venous congestion for worsening of renal function in advanced decompensated heart failure. *J Am Coll Cardiol* 2009;**53**:589–596.
- Chaney E, Shaw A. Pathophysiology of fluid retention in heart failure. *Contribution Nephrol* 2010;**164**:46–53.
- Suckling RJ, He FJ, Markandu ND, MacGregor GA. Dietary salt influences post-prandial plasma sodium concentration and systolic blood pressure. *Kidney Int* 2012;**81**:407–411.
- Boron WF. *BE. Medical Physiology: a cellular and molecular approach*. Philadelphia: Saunders Elsevier; 2009.
- Ezekowitz J, McAlister FA, Humphries KH, Norris CM, Tonelli M, Ghali WA, et al. The association among renal insufficiency, pharmacotherapy, and outcomes in 6,427 patients with heart failure and coronary artery disease. *J Am Coll Cardiol* 2004;**44**:1587–1592.
- Heywood JT, Fonarow GC, Costanzo MR, Mathur VS, Wigneswaran JR, Wynne J, et al. High prevalence of renal dysfunction and its impact on outcome in 118,465 patients hospitalized with acute decompensated heart failure: a report from the ADHERE database. *J Cardiac Fail* 2007;**13**:422–430.
- Hebert K, Dias A, Delgado MC, Franco E, Tamariz L, Steen D, et al. Epidemiology and survival of the five stages of chronic kidney disease in a systolic heart failure population. *Eur J Heart Fail* 2010;**12**:861–865.
- Damman K, Masson S, Hillege HL, Voors AA, van Veldhuisen DJ, Rossignol P, et al. Tubular damage and worsening renal function in chronic heart failure. *JACC Heart Fail* 2013;**1**:417–424.
- Cleland JG, Teerlink JR, Senior R, Nifontov EM, Mc Murray JJ, Lang CC, et al. The effects of the cardiac myosin activator, omecamtiv mecarbil, on cardiac function in systolic heart failure: a double-blind, placebo-controlled, crossover, dose-ranging phase 2 trial. *Lancet* 2011;**378**:676–683.
- Dupont M, Shrestha K, Singh D, Awad A, Kovach C, Scarpino M, et al. Lack of significant renal tubular injury despite acute kidney injury in acute decompensated heart failure. *Eur J Heart Fail* 2012;**14**:597–604.
- Damman K, Masson S, Hillege HL, Maggioni AP, Voors AA, Opasich C, et al. Clinical outcome of renal tubular damage in chronic heart failure. *Eur Heart J* 2011;**32**:2705–2712.
- Forman DE, Butler J, Wang Y, Abraham WT, O'Connor CM, Gottlieb SS, et al. Incidence, predictors at admission, and impact of worsening renal function among patients hospitalized with heart failure. *J Am Coll Cardiol* 2004;**43**:61–67.
- Hillege HL, Girbes AR, de Kam PJ, Boomsma F, de Zeeuw D, Charlesworth A, et al. Renal function, neurohormonal activation, and survival in patients with chronic heart failure. *Circulation* 2000;**102**:203–210.
- Verbrugge FH, Nijst P, Dupont M, Reynders C, Penders J, Tang WH, et al. Prognostic value of glomerular filtration changes versus natriuretic response in decompensated heart failure with reduced ejection. *J Card Fail* 2014;**20**:817–824.
- Krumholz HM, Chen YT, Vaccarino V, Wang Y, Radford MJ, Bradford WD, et al. Correlates and impact on outcomes of worsening renal function in patients > or = 65 years of age with heart failure. *Am J Cardiol* 2000;**85**:1110–1113.
- Dupont M, Mullens W, Finucan M, Taylor DO, Starling RC, Tang WH. Determinants of dynamic changes in serum creatinine in acute decompensated heart failure: the importance of blood pressure reduction during treatment. *Eur J Heart Fail* 2013;**15**:433–440.
- Mullens W, Abrahams Z, Skouri HN, Francis GS, Taylor DO, Starling RC, et al. Elevated intra-abdominal pressure in acute decompensated heart failure: a potential contributor to worsening renal function? *J Am Coll Cardiol* 2008;**51**:300–306.
- Tang WH, Mullens W. Cardiorenal syndrome in decompensated heart failure. *Heart* 2010;**96**:255–260.
- Mullens W, Nijst P. Cardiac output and renal dysfunction: definitely more than impaired flow. *J Am Coll Cardiol* 2016;**67**:2209–2212.
- Hanberg JS, Sury K, Wilson FP, Brisco MA, Ahmad T, Ter Maaten JM, et al. Reduced cardiac index is not the dominant driver of renal dysfunction in heart failure. *J Am Coll Cardiol* 2016;**67**:2199–2208.
- Testani JM, Chen J, McCauley BD, Kimmel SE, Shannon RP. Potential effects of aggressive decongestion during the treatment of decompensated heart failure on renal function and survival. *Circulation* 2010;**122**:265–272.
- Verbrugge FH, Dupont M, Steels P, Grieten L, Swennen Q, Tang WH, et al. The kidney in congestive heart failure: 'are natriuresis, sodium, and diuretics really the good, the bad and the ugly?' *Eur J Heart Fail* 2014;**16**:133–142.
- Mullens W, Abrahams Z, Francis GS, Taylor DO, Starling RC, Tang WH. Prompt reduction in intra-abdominal pressure following large-volume mechanical fluid removal improves renal insufficiency in refractory decompensated heart failure. *J Card Fail* 2008;**14**:508–514.
- Verbrugge FH, Grieten L, Mullens W. Management of the cardiorenal syndrome in decompensated heart failure. *Cardiorenal Med* 2014;**4**:176–188.
- Verbrugge FH, Dupont M, Steels P, Grieten L, Malbrain M, Tang WH, et al. Abdominal contributions to cardiorenal dysfunction in congestive heart failure. *J Am Coll Cardiol* 2013;**62**:485–495.
- Gibson DG, Marshall JC, Lockey E. Assessment of proximal tubular sodium reabsorption during water diuresis in patients with heart disease. *Br Heart J* 1970;**32**:399–405.
- Lewy JE, Windhager EE. Peritubular control of proximal tubular fluid reabsorption in the rat kidney. *Am J Physiol* 1968;**214**:943–954.
- Gottschalk CW, Mylle M. Micropuncture study of pressures in proximal tubules and peritubular capillaries of the rat kidney and their relation to ureteral and renal venous pressures. *Am J Physiol* 1956;**185**:430–439.
- Haddy FJ, Scott J, Fleishman M, Emanuel D. Effect of change in renal venous pressure upon renal vascular resistance, urine and lymph flow rates. *Am J Physiol* 1958;**195**:97–110.
- Lebric SJ, Mayerson HS. Influence of elevated venous pressure on flow and composition of renal lymph. *Am J Physiol* 1960;**198**:1037–1040.
- Lassiter WE, Gottschalk CW, Mylle M. Micropuncture study of net transtubular movement of water and urea in nondiuretic mammalian kidney. *Am J Physiol* 1961;**200**:1139–1147.
- Gottschalk CW, Lassiter WE, Mylle M, Ullrich KJ, Schmidt-Nielsen B, O'dell R, Pehling G. Micropuncture study of composition of loop of Henle fluid in desert rodents. *Am J Physiol* 1963;**204**:532–535.
- Gottschalk CW. Micropuncture studies of tubular function in the mammalian kidney. *Folia Med Neerl* 1962;**5**:11–30.
- Star RA, Nonoguchi H, Balaban R, Knepper MA. Calcium and cyclic adenosine monophosphate as second messengers for vasopressin in the rat inner medullary collecting duct. *J Clin Invest* 1988;**81**:1879–1888.
- Park F, Mattson DL, Skelton MM, Cowley AW Jr. Localization of the vasopressin V1a and V2 receptors within the renal cortical and medullary circulation. *Am J Physiol* 1997;**273**:R243–R251.
- Ali SS, Olinger CC, Sobotka PA, Dahle TG, Bunte MC, Blake D, et al. Loop diuretics can cause clinical natriuretic failure: a prescription for volume expansion. *Congest Heart Fail* 2009;**15**:1–4.
- Schnermann J. Juxtaglomerular cell complex in the regulation of renal salt excretion. *Am J Physiol* 1998;**274**:R263–R279.
- Lote CJ, Snape BM. Collecting duct flow rate as a determinant of equilibration between urine and renal papilla in the presence of a maximal antidiuretic hormone concentration. *J Physiol* 1977;**270**:533–544.
- Allen GG, Barratt LJ. Effect of aldosterone on the transepithelial potential difference of the rat distal tubule. *Kidney Int* 1981;**19**:678–686.

42. Woodhall PB, Tisher CC. Response of the distal tubule and cortical collecting duct to vasopressin in the rat. *J Clin Invest* 1973;**52**:3095–3108.
43. Jamison RL, Oliver RE. Disorders of urinary concentration and dilution. *Am J Med* 1982;**72**:308–322.
44. Leviel F, Hubner CA, Houillier P, Morla L, El Moghrabi S, Brideau G, et al. The Na<sup>+</sup>-dependent chloride-bicarbonate exchanger SLC4A8 mediates an electro-neutral Na<sup>+</sup> reabsorption process in the renal cortical collecting ducts of mice. *J Clin Invest* 2010;**120**:1627–1635.
45. Verbrugge FH, Steels P, Grieten L, Nijst P, Tang WH, Mullens W. Hyponatremia in acute decompensated heart failure: depletion versus dilution. *J Am Coll Cardiol* 2015;**65**:480–492.
46. Schrier RW. Aldosterone 'escape' vs 'breakthrough'. *Nat Rev Nephrol* 2010;**6**:61.
47. Tang WH, Vagelos RH, Yee YG, Benedict CR, Willson K, Liss CL, et al. Neurohormonal and clinical responses to high- versus low-dose enalapril therapy in chronic heart failure. *J Am Coll Cardiol* 2002;**39**:70–78.
48. Verbrugge FH, Dupont M, Bertrand PB, Nijst P, Penders J, Dens J, et al. Determinants and impact of the natriuretic response to diuretic therapy in heart failure with reduced ejection fraction and volume overload. *Acta Cardiol* 2015;**70**:265–273.
49. Singh D, Shrestha K, Testani JM, Verbrugge FH, Dupont M, Mullens W, et al. Insufficient natriuretic response to continuous intravenous furosemide is associated with poor long-term outcomes in acute decompensated heart failure. *J Cardiac Fail* 2014;**20**:392–399.
50. Testani JM, Brisco MA, Turner JM, Spatz ES, Bellumkonda L, Parikh CR, et al. Loop diuretic efficiency: a metric of diuretic responsiveness with prognostic importance in acute decompensated heart failure. *Circ Heart Fail* 2014;**7**:261–270.
51. Kim GH. Long-term adaptation of renal ion transporters to chronic diuretic treatment. *Am J Nephrol* 2004;**24**:595–605.
52. Verbrugge FH, Grieten L, Mullens W. New insights into combinational drug therapy to manage congestion in heart failure. *Curr Heart Fail Rep* 2014;**11**:1–9.
53. Martens P, Nijst P, Mullens W. Current approach to decongestive therapy in acute heart failure. *Curr Heart Fail Rep* 2015;**12**:367–378.
54. Testani JM, Coca SG, McCauley BD, Shannon RP, Kimmel SE. Impact of changes in blood pressure during the treatment of acute decompensated heart failure on renal and clinical outcomes. *Eur J Heart Fail* 2011;**13**:877–884.
55. Dupont M, Mullens W, Finucan M, Taylor DO, Starling RC, Tang WH. Determinants of dynamic changes in serum creatinine in acute decompensated heart failure: the importance of blood pressure reduction during treatment. *Eur J Heart Fail* 2013;**15**:433–440.
56. Valente MA, Voors AA, Damman K, Van Veldhuisen DJ, Massie BM, O'Connor CM, et al. Diuretic response in acute heart failure: clinical characteristics and prognostic significance. *Eur Heart J* 2014;**35**:1284–1293.
57. Voors AA, Davison BA, Teerlink JR, Felker GM, Cotter G, Filippatos G, et al. Diuretic response in patients with acute decompensated heart failure: characteristics and clinical outcome—an analysis from RELAX-AHF. *Eur J Heart Fail* 2014;**16**:1230–1240.
58. Aronson D, Burger AJ. Diuretic response: clinical and hemodynamic predictors and relation to clinical outcome. *J Card Fail* 2015.
59. Ter Maaten JM, Dunning AM, Valente MA, Damman K, Ezekowitz JA, Califf RM, et al. Diuretic response in acute heart failure—an analysis from ASCEND-HF. *Am Heart J* 2015;**170**:313–321 e4.
60. Kumar D, Bagarhatta R. Fractional excretion of sodium and its association with prognosis of decompensated heart failure patients. *J Clin Diagn Res* 2015;**9**:1–9.
61. Testani JM, Hanberg JS, Cheng S, Rao V, Onyebeke C, Laur O, et al. Rapid and highly accurate prediction of poor loop diuretic natriuretic response in patients with heart failure. *Circ Heart Fail* 2016;**9**:e002370.
62. Kramer BK, Schweda F, Riegger GA. Diuretic treatment and diuretic resistance in heart failure. *Am J Med* 1999;**106**:90–96.
63. Murray MD, Deer MM, Ferguson JA, Dexter PR, Bennett SJ, Perkins SM, et al. Open-label randomized trial of torsemide compared with furosemide therapy for patients with heart failure. *Am J Med* 2001;**111**:513–520.
64. Cosin J, Diez J. Torasemide in chronic heart failure: results of the TORIC study. *Eur J Heart Fail* 2002;**4**:507–513.
65. Muller K, Gamba G, Jaquet F, Hess B. Torasemide vs. furosemide in primary care patients with chronic heart failure NYHA II to IV—efficacy and quality of life. *Eur J Heart Fail* 2003;**5**:793–801.
66. Felker GM, Lee KL, Bull DA, Redfield MM, Stevenson LW, Goldsmith SR, et al. Diuretic strategies in patients with acute decompensated heart failure. *N Engl J Med* 2011;**364**:797–805.
67. Francis GS, Siegel RM, Goldsmith SR, Olivari MT, Levine TB, Cohn JN. Acute vasoconstrictor response to intravenous furosemide in patients with chronic congestive heart failure. Activation of the neurohumoral axis. *Ann Intern Med* 1985;**103**:1–6.
68. Cooper HA, Dries DL, Davis CE, Shen YL, Domanski MJ. Diuretics and risk of arrhythmic death in patients with left ventricular dysfunction. *Circulation* 1999;**100**:1311–1315.
69. Gotsman I, Keren A, Lotan C, Zwas DR. Changes in uric acid levels and allopurinol use in chronic heart failure: association with improved survival. *J Card Fail* 2012;**18**:694–701.
70. Loon NR, Wilcox CS, Unwin RJ. Mechanism of impaired natriuretic response to furosemide during prolonged therapy. *Kidney Int* 1989;**36**:682–689.
71. Pitt B, Zannad F, Remme WJ, Cody R, Castaigne A, Perez A, et al. Randomized aldactone evaluation study investigators. The effect of spironolactone on morbidity and mortality in patients with severe heart failure. *N Engl J Med* 1999;**341**:709–717.
72. Zannad F, McMurray JJ, Krum H, van Veldhuisen DJ, Swedberg K, Shi H, et al. Eplerenone in patients with systolic heart failure and mild symptoms. *N Engl J Med* 2011;**364**:11–21.
73. Zahedi K, Barone S, Xu J, Soleimani M. Potentiation of the effect of thiazide derivatives by carbonic anhydrase inhibitors: molecular mechanisms and potential clinical implications. *PLoS One* 2013;**8**:e79327.
74. Amlal H, Soleimani M. Pendrin as a novel target for diuretic therapy. *Cell Physiol Biochem* 2011;**28**:521–526.
75. Soleimani M, Barone S, Xu J, Shull GE, Siddiqui F, Zahedi K, et al. Double knock-out of pendrin and Na-Cl cotransporter (NCC) causes severe salt wasting, volume depletion, and renal failure. *Proc Natl Acad Sci USA* 2012;**109**:13368–13373.
76. Hanley T, Platts MM. Acetazolamide (diamox) in the treatment of congestive heart-failure. *Lancet* 1956;**270**:357–359.
77. Knauf H, Mutschler E. Sequential nephron blockade breaks resistance to diuretics in edematous states. *J Cardiovasc Pharmacol* 1997;**29**:367–372.
78. Mebazaa A, Parissis J, Porcher R, Gayat E, Nikolaou M, Boas FV, et al. Short-term survival by treatment among patients hospitalized with acute heart failure: the global ALARM-HF registry using propensity scoring methods. *Intensive Care Med* 2011;**37**:290–301.
79. Cotter G, Metzker E, Kaluski E, Faigenberg Z, Miller R, Simovitz A, et al. Randomised trial of high-dose isosorbide dinitrate plus low-dose furosemide versus high-dose furosemide plus low-dose isosorbide dinitrate in severe pulmonary oedema. *Lancet* 1998;**351**:389–393.
80. Mullens W, Abrahams Z, Francis GS, Skouri HN, Starling RC, Young JB, et al. Sodium nitroprusside for advanced low-output heart failure. *J Am Coll Cardiol* 2008;**52**:200–207.
81. Mullens W, Abrahams Z, Francis GS, Sokos G, Starling RC, Young JB, et al. Usefulness of Isosorbide Dinitrate and Hydralazine as add-on therapy in patients discharged for advanced decompensated heart failure. *Am J Cardiol* 2009;**103**:1113–1119.
82. Chen HH, Anstrom KJ, Givertz MM, Stevenson LW, Semigran MJ, Goldsmith SR, et al. Low-dose dopamine or low-dose nesiritide in acute heart failure with renal dysfunction: the ROSE acute heart failure randomized trial. *JAMA* 2013;**310**:2533–2543.
83. Anker SD, Ponikowski P, Mitrovic V, Peacock WF, Filippatos G. Ularitide for the treatment of acute decompensated heart failure: from preclinical to clinical studies. *Eur Heart J* 2015;**36**:715–723.
84. Elsner D, Muders F, Muntze A, Kromer EP, Forssmann WG, Riegger GA. Efficacy of prolonged infusion of urodilatin [ANP-(95-126)] in patients with congestive heart failure. *Am Heart J* 1995;**129**:766–773.
85. Kentsch M, Ludwig D, Drummer C, Gerzer R, Muller-Esch G. Haemodynamic and renal effects of urodilatin bolus injections in patients with congestive heart failure. *Eur J Clin Invest* 1992;**22**:662–669.
86. Mitrovic V, Seferovic PM, Simeunovic D, Ristic AD, Miric M, Moiseyev VS, et al. Haemodynamic and clinical effects of ularitide in decompensated heart failure. *Eur Heart J* 2006;**27**:2823–2832.
87. Mitrovic V, Luss H, Nitsche K, Forssmann K, Maronde E, Fricke K, et al. Effects of the renal natriuretic peptide urodilatin (ularitide) in patients with decompensated chronic heart failure: a double-blind, placebo-controlled, ascending-dose trial. *Am Heart J* 2005;**150**:1239.
88. Teerlink JR, Cotter G, Davison BA, Felker GM, Filippatos G, Greenberg BH, et al. Serelexin, recombinant human relaxin-2, for treatment of acute heart failure (RELAX-AHF): a randomised, placebo-controlled trial. *Lancet* 2013;**381**:29–39.
89. Metra M, Ponikowski P, Cotter G, Davison BA, Felker GM, Filippatos G, et al. Effects of serelexin in subgroups of patients with acute heart failure: results from RELAX-AHF. *Eur Heart J* 2013;**34**:3128–3136.
90. Voors AA, Dahlke M, Meyer S, Stepinska J, Gottlieb SS, Jones A, et al. Renal hemodynamic effects of serelexin in patients with chronic heart failure: a randomized, placebo-controlled study. *Circ Heart Fail* 2014;**7**:994–1002.



91. Costanzo MR, Saltzberg MT, Jessup M, Teerlink JR, Sobotka PA, Ultrafiltration Versus Intravenous Diuretics For Patients Hospitalized For Acute Decompensated Heart Failure Investigators. Ultrafiltration is associated with fewer rehospitalizations than continuous diuretic infusion in patients with decompensated heart failure: results from UNLOAD. *J Cardiac Fail* 2010;**16**:277–284.
92. Bart BA, Goldsmith SR, Lee KL, Givertz MM, O'Connor CM, Bull DA, et al. Ultrafiltration in decompensated heart failure with cardiorenal syndrome. *N Engl J Med* 2012;**367**:2296–2304.
93. Costanzo MR, Guglin ME, Saltzberg MT, Jessup ML, Bart BA, Teerlink JR, et al. Ultrafiltration versus intravenous diuretics for patients hospitalized for acute decompensated heart failure. *J Am Coll Cardiol* 2007;**49**:675–683.
94. Testani JM, Kimmel SE, Dries DL, Coca SG. Prognostic importance of early worsening renal function after initiation of angiotensin-converting enzyme inhibitor therapy in patients with cardiac dysfunction. *Circ Heart Fail* 2011;**4**:685–691.
95. Zinman B, Wanner C, Lachin JM, Fitchett D, Bluhmki E, Hantel S, et al. Empagliflozin, cardiovascular outcomes, and mortality in type 2 diabetes. *N Engl J Med* 2015;**373**:2117–2128.
96. McMurray JJ, Packer M, Desai AS, Gong J, Lefkowitz MP, Rizkala AR, et al. Angiotensin-neprilysin inhibition versus enalapril in heart failure. *N England J Med* 2014;**371**:993–1004.
97. Buggey J, Mentz RJ, DeVore AD, Velazquez EJ. Angiotensin receptor neprilysin inhibition in heart failure: mechanistic action and clinical impact. *J Cardiac Fail* 2015;**21**:741–750.
